# Supplementary material for: A reactive oxygen species activation mechanism contributes to JS-K-induced apoptosis in human bladder cancer cells
Source: PubMed Central journal article supplement (PMC4602210; doi:10.1038/srep15104), 2015-10-13
Supplement: srep15104-s1.pdf [file srep15104-s1.pdf]

# A reactive oxygen species activation mechanism contributes to JS-K-induced apoptosis in human bladder cancer cells

Mingning Qiu<sup>1</sup>, Lieqian Chen<sup>1</sup>, Guobin Tan, Longzhi Ke, Sai Zhang, Hege Chen\*, Jianjun Liu\*\*

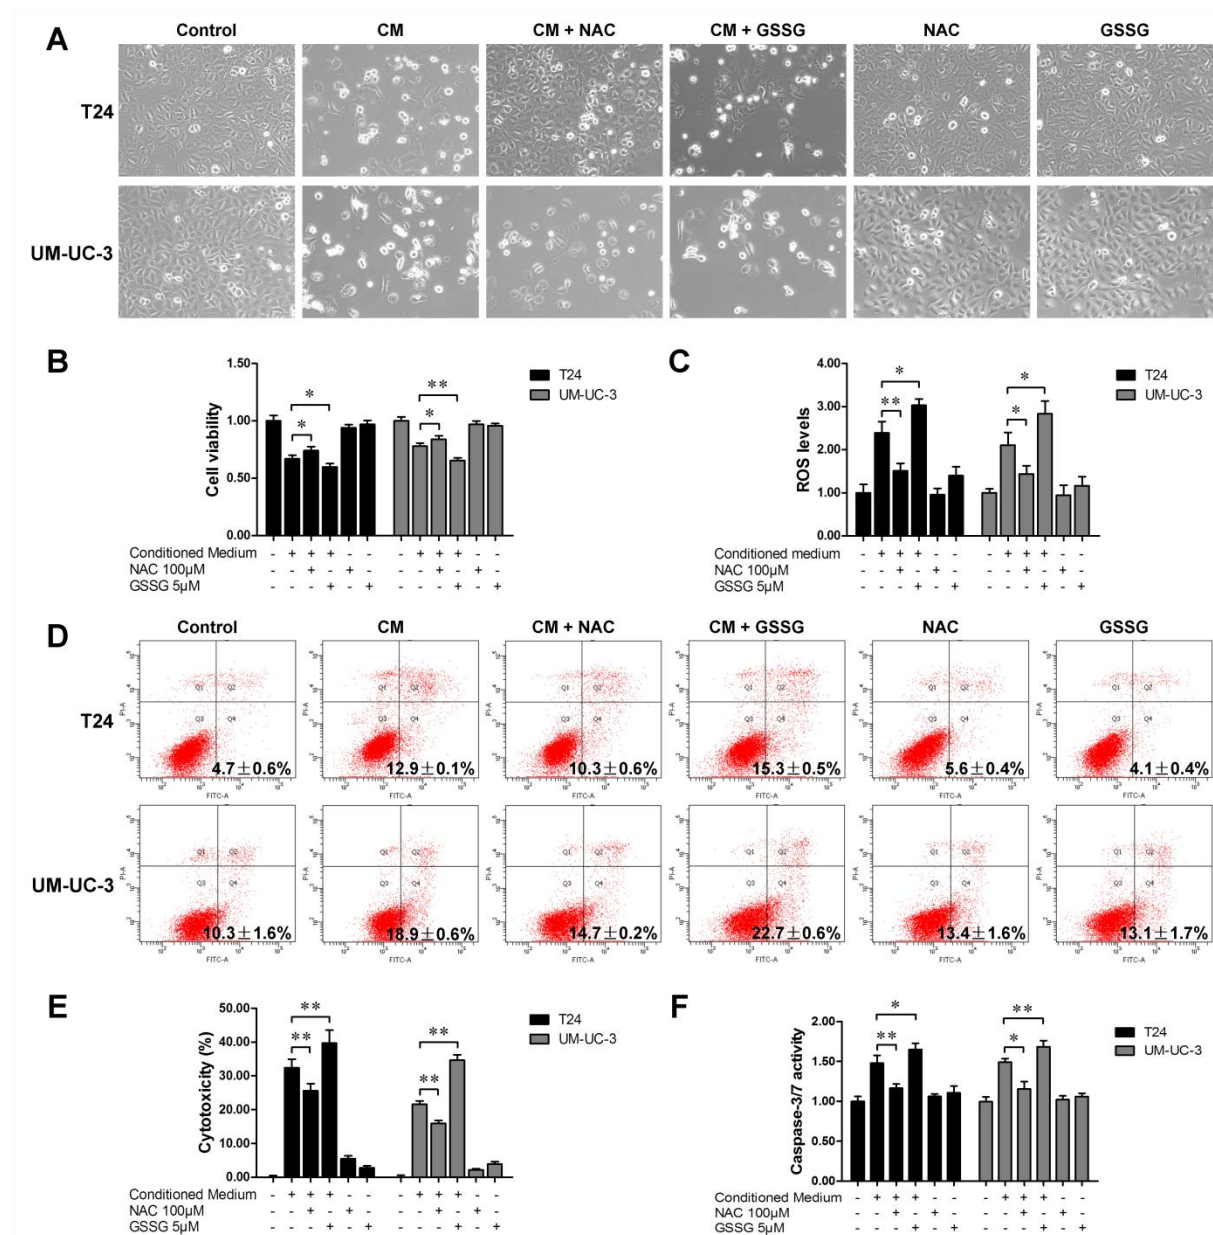

**Figure S1. Effects of NAC and GSSG on conditioned medium-induced cell growth suppression and apoptosis**

(A) Influence of conditioned medium on apoptosis in T24 and UM-UC-3 cells. Cells were incubated with 100 μM NAC or 5 μM GSSG for 24 h and then incubated with or without conditioned medium from cells treated with JS-K (5 μM). The cells were visualized by microscopy (100×). (B) Cell proliferation assay. (C) Cells were cultured in conditioned medium for 6 h after being pretreated with 100 μM NAC or 5 μM GSSG for 24 h, and the ROS level was analyzed. Apoptosis (D), cytotoxicity (E) and caspase-3/7 activity (F) were examined according to the distributions for the treatments in (A). The data are presented as the mean ± SD for at least three independent experiments. Single asterisks (\*) indicate a significant difference ( $P < 0.05$ ), and double asterisks (\*\*) indicate an extremely significant difference ( $P < 0.01$ ).

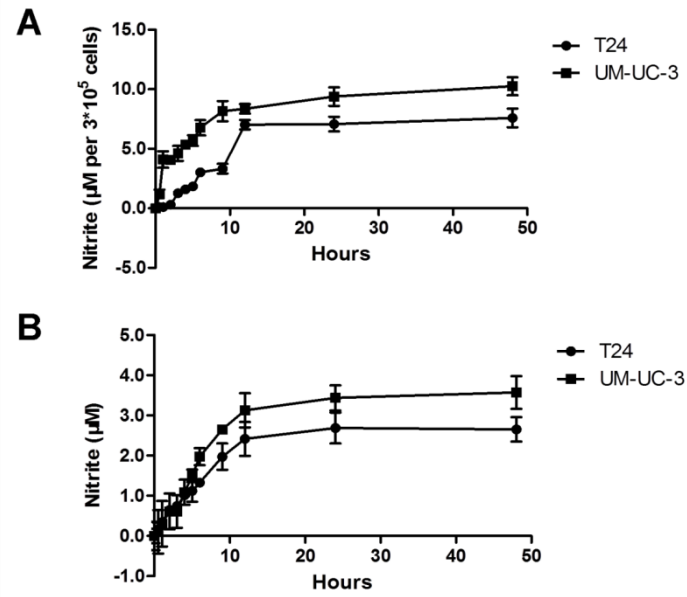

**Figure S2. Release of NO from JS-K**

Production of NO from JS-K in bladder cancer cells (A) and the medium containing 10 % FBS (B) was detected indirectly by detection of nitrite by using a NO assay kit (Beyotime). The data presented are the mean  $\pm$  SD for at least three independent experiments.

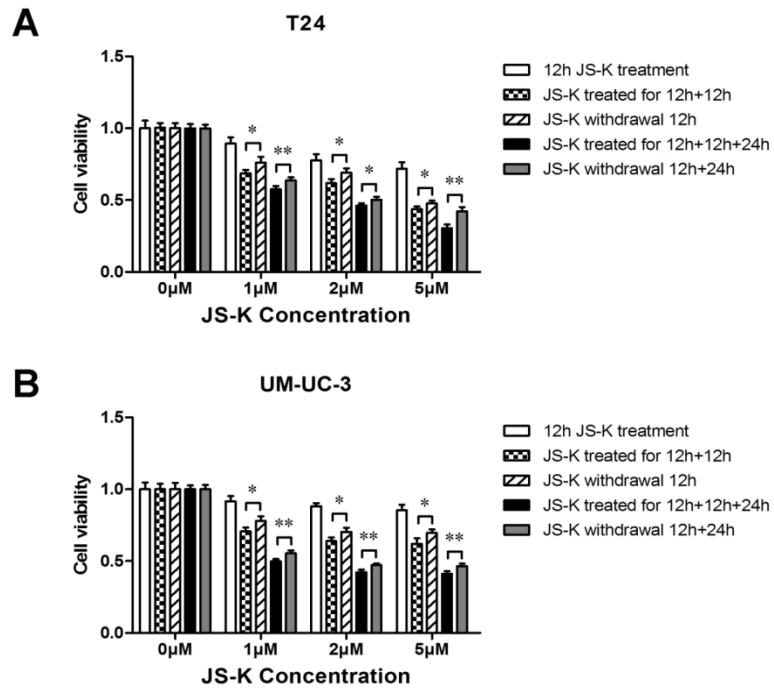

**Figure S3. Bladder cancer cell proliferation with JS-K or JS-K withdrawal**

T24 (A) and UM-UC-3 (B) cells were cultured with fresh medium up to 36 h after JS-K withdrawal after being treated with JS-K for 12 h. Cell viability was measured by a CCK-8 assay. The data presented are the mean  $\pm$  SD for at least three independent experiments. Single asterisks (\*) indicate a significant difference ( $P < 0.05$ ), and double asterisks (\*\*) indicates an extremely significant difference ( $P < 0.01$ ).
